# Supplementary material for: Polyoxometalate modified transparent metal selenide counter electrodes for high-efficiency bifacial dye-sensitized solar cells
Source: Royal Society of Chemistry journal article supplement (doi:10.1039/d1qi00447f), 2021-01-01
Supplement: d1qi00447f1.pdf [file d1qi00447f1.pdf]

# **Polyoxometalate modified transparent metal selenide counter electrodes for high-efficiency bifacial dye-sensitized solar cells**

*Lu Zhang,<sup>a</sup> Weichao Chen,<sup>\*a</sup> Ting Wang,<sup>a</sup> Yunjiang Li,<sup>a</sup> Chunhui Ma,<sup>a</sup> Yuxiao Zheng<sup>a</sup>  
and Jian Gong<sup>\*a</sup>*

<sup>a</sup>Key Laboratory of Polyoxometalate and Reticular Material Chemistry of Ministry of Education, Department of Chemistry, Northeast Normal University, Changchun, Jilin 130024, China

Email: chenwc061@nenu.edu.cn

## Table of Contents

Figure S1. Full XPS spectra of (a)  $\text{Co}_{0.85}\text{Se}$ ; High-resolution XPS spectra of (b) P 2p of  $\text{PW}_{11}\text{Co}/\text{Co}_{0.85}\text{Se}$

Figure. S2 EDX spectra of  $\text{PW}_{11}\text{Co}/\text{Co}_{0.85}\text{Se}$

Figure S3 EDX elemental mapping of Co, Se, P, W and O in  $\text{PW}_{11}\text{Co}/\text{Co}_{0.85}\text{Se}$

Figure S4 TEM images of  $\text{PW}_{11}\text{Co}/\text{Co}_{0.85}\text{Se}$

Figure S5 IR, XRD, and transparency images of the  $\text{PW}_{11}\text{Co}/\text{Co}_{0.85}\text{Se}$  catalyst before and after the test

Figure S6 SEM of  $\text{PW}_{11}\text{Co}/\text{Co}_{0.85}\text{Se}$  CE before and after durability test

Figure S7 Elemental mapping of Co, Se, P, W and O in  $\text{PW}_{11}\text{Co}/\text{Co}_{0.85}\text{Se}$  after durability test

Figure S8 Bode curves of Pt,  $\text{Co}_{0.85}\text{Se}$ ,  $\text{PW}_{11}\text{Co}-0.3/\text{Co}_{0.85}\text{Se}$ ,  $\text{PW}_{11}\text{Co}-0.5/\text{Co}_{0.85}\text{Se}$ , and  $\text{PW}_{11}\text{Co}-0.8/\text{Co}_{0.85}\text{Se}$  CEs

Figure. S9 Long-term stability of DSSCs based on  $\text{PW}_{11}\text{Co}/\text{Co}_{0.85}\text{Se}$

Figure. S10 CV curves of  $\text{PW}_{11}\text{Co}/\text{Co}_{0.85}\text{Se}$  electrode subjected to aging for some days at room temperature

Figure. S11 Nyquist plot of  $\text{PW}_{11}\text{Co}/\text{Co}_{0.85}\text{Se}$  electrode subjected to aging for some days at room temperature

Figure. S12 Tafel of  $\text{PW}_{11}\text{Co}/\text{Co}_{0.85}\text{Se}$  electrode subjected to aging for some days at room temperature.

Figure. S13 (a) Cyclic voltammetry curve of  $\text{PW}_{11}\text{Co}$  (1 mol  $\text{L}^{-1}$  KCl solution at pH=7). (b) A plot of Kubelka–Munk function F against energy E of  $\text{PW}_{11}\text{Co}$ .

Table S1 EIS parameters using the different materials as CE

Table S2 Photovoltaic parameters of the DSSCs assembled with other CEs

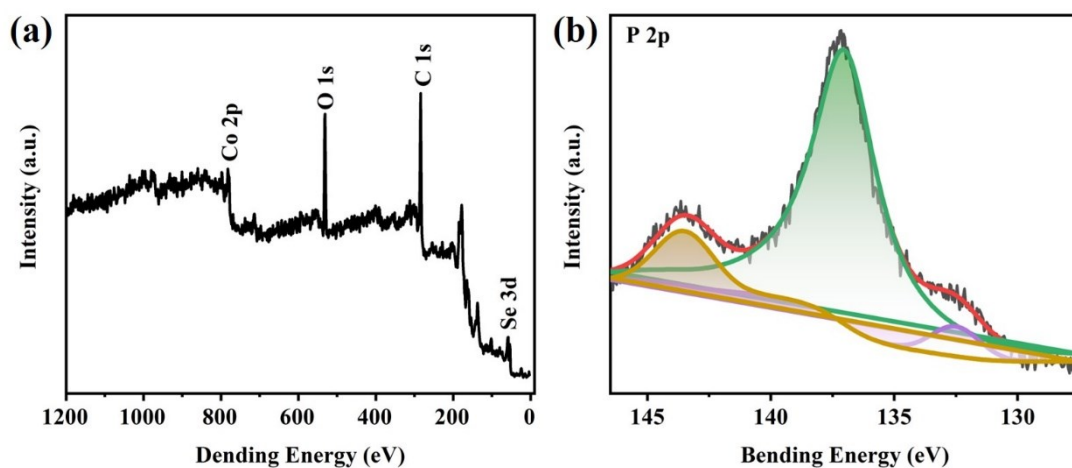

Figure S1 Full XPS spectra of (a)  $\text{Co}_{0.85}\text{Se}$ ; High-resolution XPS spectra of (b) P 2p of  $\text{PW}_{11}\text{Co}/\text{Co}_{0.85}\text{Se}$ .

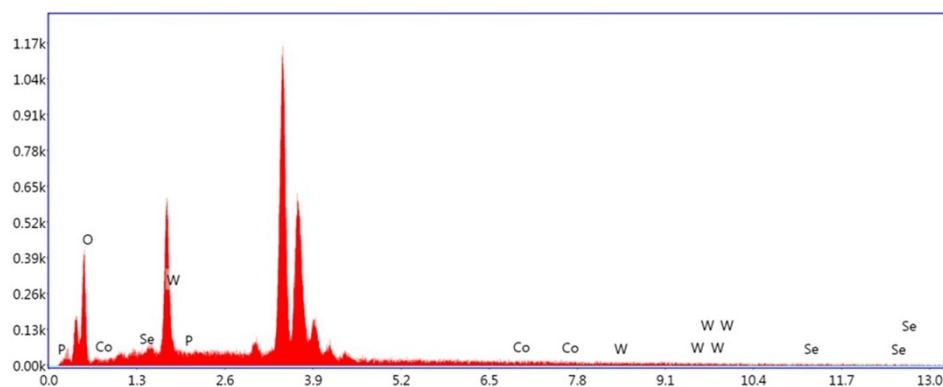

Figure. S2 EDX spectra of  $\text{PW}_{11}\text{Co}/\text{Co}_{0.85}\text{Se}$ .

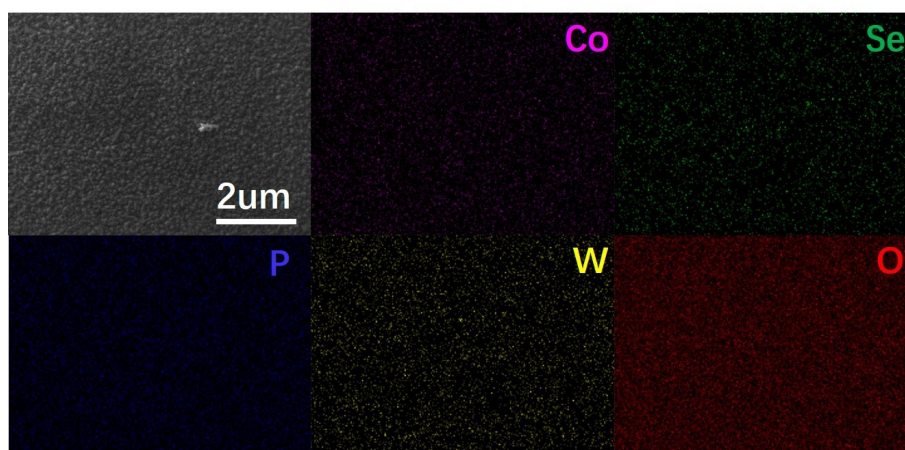

Figure S3 EDX elemental mapping of Co, Se, P, W and O in  $\text{PW}_{11}\text{Co}/\text{Co}_{0.85}\text{Se}$ .

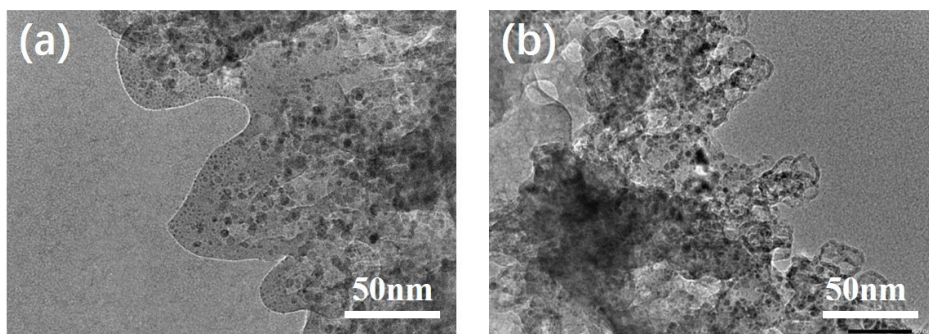

Figure S4 TEM images of  $PW_{11}Co/Co_{0.85}Se$ .

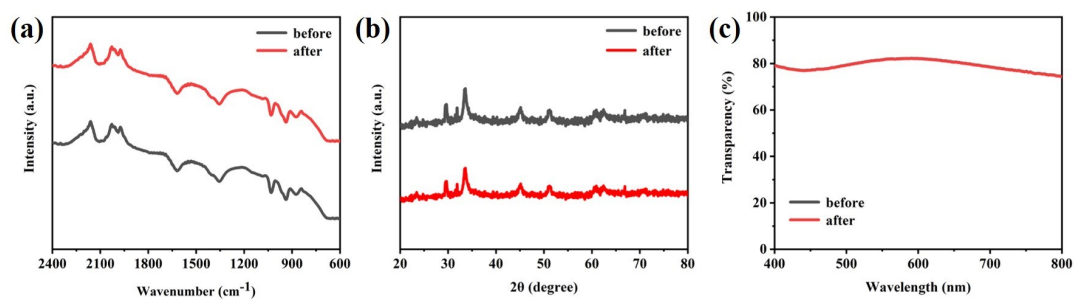

Figure S5 The IR, XRD and optical transmittance spectra of the  $PW_{11}Co/Co_{0.85}Se$  CE after the durability tests.

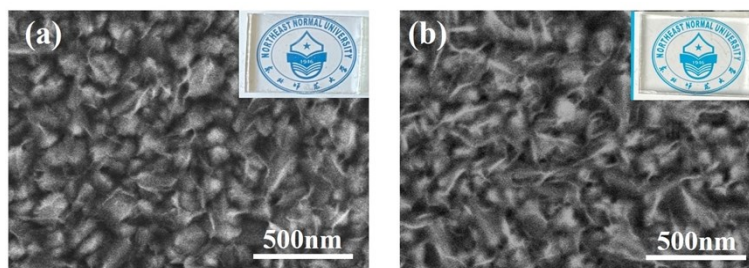

Figure S6 SEM of  $PW_{11}Co/Co_{0.85}Se$  CE before and after durability test.

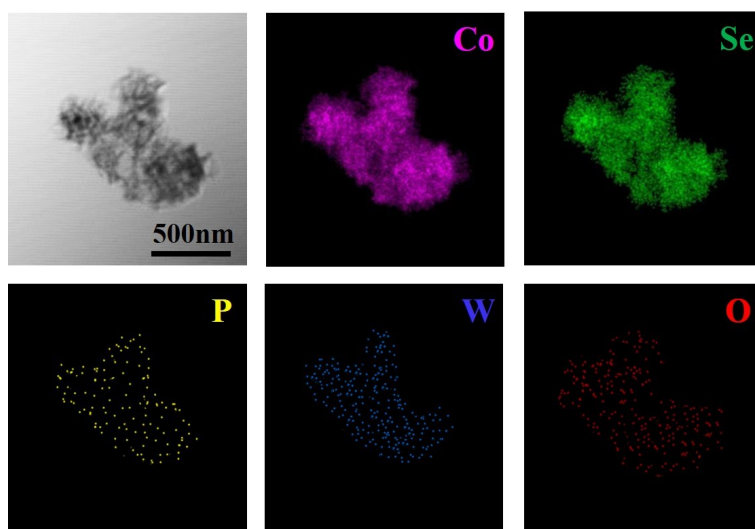

Figure S7 Elemental mapping of Co, Se, P, W and O in  $PW_{11}Co/Co_{0.85}Se$  after durability test.

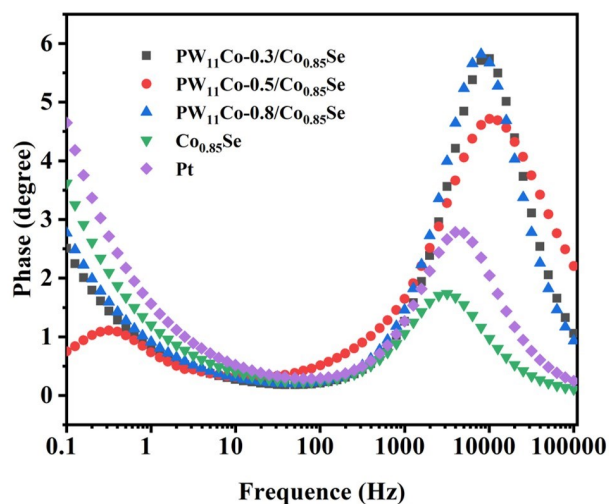

Figure S8 Bode curves of Pt, Co<sub>0.85</sub>Se, PW<sub>11</sub>Co-0.3/Co<sub>0.85</sub>Se, PW<sub>11</sub>Co-0.5/Co<sub>0.85</sub>Se, and PW<sub>11</sub>Co-0.8/Co<sub>0.85</sub>Se CEs.

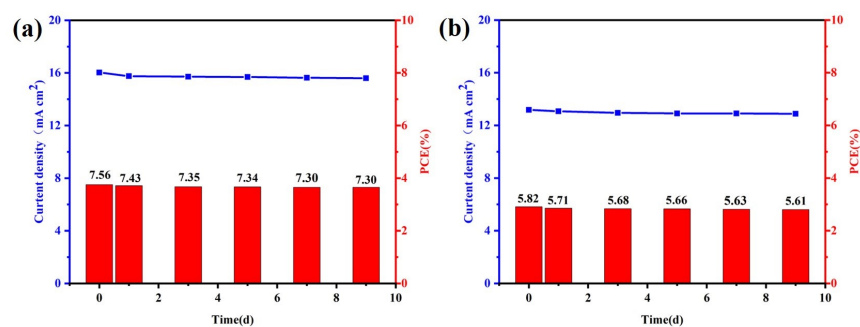

Figure. S9 Long-term stability of DSSCs based on PW<sub>11</sub>Co/Co<sub>0.85</sub>Se.

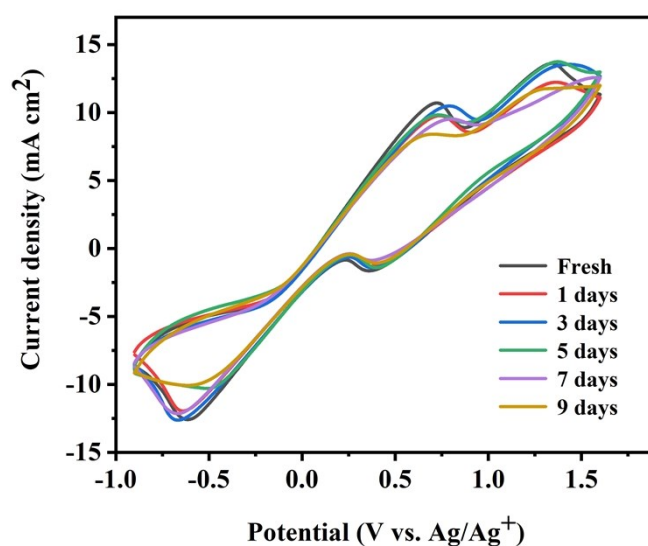

Figure. S10 CV curves of PW<sub>11</sub>Co/Co<sub>0.85</sub>Se electrode subjected to aging for some days at room temperature.

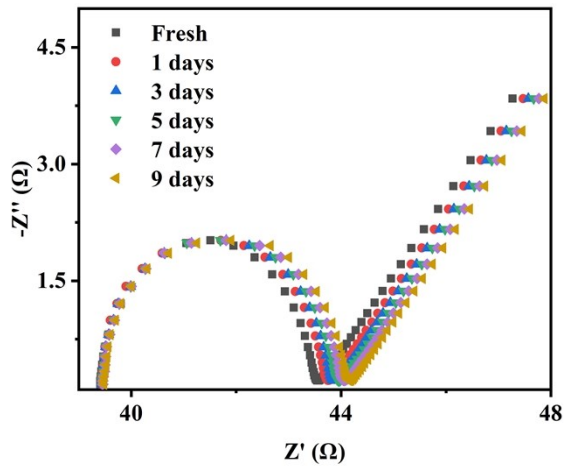

Figure. S11 Nyquist plot of  $PW_{11}Co/Co_{0.85}Se$  electrode subjected to aging for some days at room temperature.

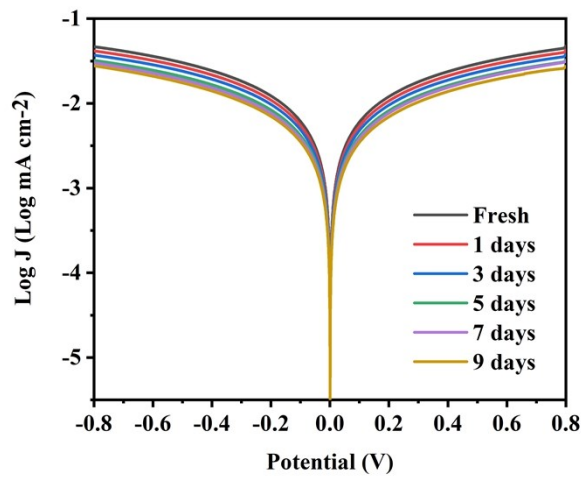

Figure. S12 Tafel of  $PW_{11}Co/Co_{0.85}Se$  electrode subjected to aging for some days at room temperature.

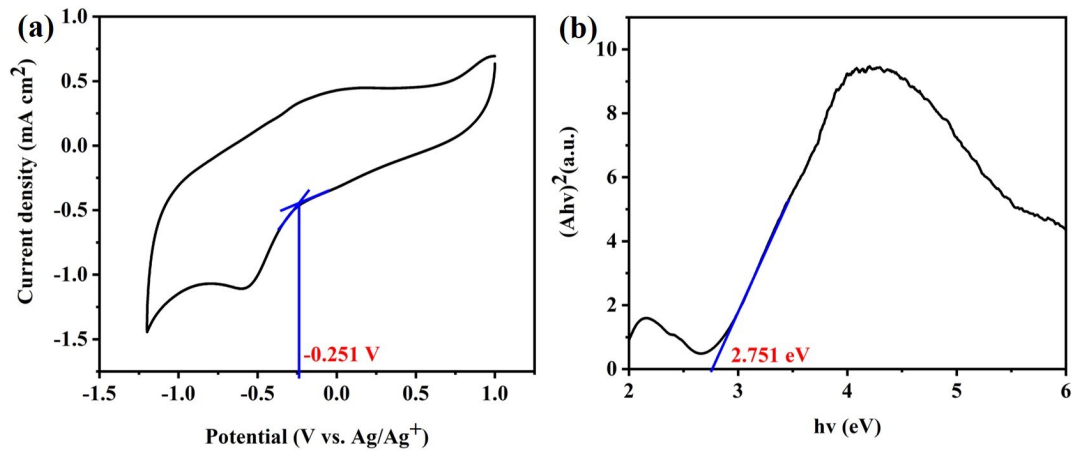

Figure. S13 (a) Cyclic voltammogram curve of  $PW_{11}Co$  ( $1 \text{ mol L}^{-1}$  KCl solution at  $\text{pH}=7$ ). (b) A plot of Kubelka–Munk function  $F$  against energy  $E$  of  $PW_{11}Co$ .

Cyclic Voltammetry (CV) is widely used to study the electrochemical characteristics of materials. The first reduction peak of the CV curve is used to estimate the LUMO energy level of  $PW_{11}Co$ .<sup>[16]</sup> The value of the abscissa relative to the Ag/AgCl standard electrode is -0.251 V, which is converted to a standard hydrogen electrode of -0.054 V, and converted to a vacuum energy level, that is, the LUMO energy level is -4.45 eV. Solid diffuse reflection is used to estimate the bandwidth of  $PW_{11}Co$ . We use the Kubelka–Munk function  $F$  to plot the energy  $E$  of  $PW_{11}Co$ .<sup>[16]</sup> The energy axis and the extrapolation line of the linear region of the absorption edge intersect at a certain point whose quantitative value is the  $E_g$  of  $PW_{11}Co$ , so the  $E_g$  of  $PW_{11}Co$  is estimated to be 2.751 eV.

Table S1. EIS parameters using the different materials as CEs.

| Sample                       | $R_s(\Omega/cm^2)$ | $R_{ct}(\Omega/cm^2)$ | $Z_w(\Omega/cm^2)$ |
|------------------------------|--------------------|-----------------------|--------------------|
| 0.3- $PW_{11}Co/Co_{0.85}Se$ | 35.08              | 7.83                  | 0.45               |
| 0.5- $PW_{11}Co/Co_{0.85}Se$ | 39.40              | 4.02                  | 0.23               |
| 0.8- $PW_{11}Co/Co_{0.85}Se$ | 35.93              | 8.09                  | 0.39               |
| $Co_{0.85}Se$                | 34.94              | 7.65                  | 0.47               |
| Pt                           | 41.23              | 2.56                  | 0.31               |

Table S2. Photovoltaic parameters of the DSSCs assembled with other CEs.

| CEs                              | irradiation | $V_{oc} / mV$ | $J_{sc} / mA$<br>$cm^{-2}$ | $FF$ | $PCE / \%$ | Ref. |
|----------------------------------|-------------|---------------|----------------------------|------|------------|------|
| $Co_{0.85}Se$<br>nanotubes       | front       | 706           | 14.51                      | 0.52 | 5.34       | (1)  |
| $Co_{0.85}Se$<br>nanoparticles   | front       | 660           | 13.44                      | 0.68 | 6.03       | (2)  |
| Co- $Co_{0.85}Se$                | front       | 650           | 14.73                      | 0.68 | 6.55       | (3)  |
| $Co_{0.85}Se/RGO$                | front       | 706           | 16.01                      | 0.69 | 7.81       | (4)  |
| CuCoSe                           | front       | 680           | 10.61                      | 0.74 | 5.38       | (5)  |
| Polycrystalline<br>$Co_{0.85}Se$ | front       | 716           | 15.85                      | 0.69 | 7.87       | (6)  |
| CoSe                             | front       | 690           | 15.60                      | 0.66 | 6.79       | (7)  |
| $Ni_{0.85}Se$<br>nanospheres     | front       | 760           | 13.2                       | 0.68 | 6.82       | (8)  |
| PVP                              | front       | 570           | 20.32                      | 0.46 | 5.45       | (9)  |

|                                           |       |     |       |      |      |           |
|-------------------------------------------|-------|-----|-------|------|------|-----------|
| (4w%)/PANI                                | rear  | 550 | 19.08 | 0.43 | 4.66 |           |
| RuSe                                      | front | 729 | 12.17 | 0.73 | 6.51 | (10)      |
|                                           | rear  | 681 | 3.64  | 0.74 | 1.84 |           |
| PtNP-EMTE                                 | front | 700 | 11.63 | 0.68 | 5.67 | (11)      |
|                                           | rear  | 700 | 9.98  | 0.67 | 4.87 |           |
| Pt-Mo <sub>2</sub> C                      | front | 710 | 15.61 | 0.67 | 7.4  | (12)      |
|                                           | rear  | 700 | 12.00 | 0.66 | 5.5  |           |
| PVP(4wt%)/PAN<br>I                        | front | 570 | 20.32 | 0.46 | 5.45 | (13)      |
|                                           | rear  | 550 | 19.05 | 0.43 | 4.66 |           |
| 16nm-MoS <sub>2</sub>                     | front | 714 | 13.96 | 0.69 | 6.88 | (14)      |
|                                           | rear  | 689 | 6.67  | 0.72 | 3.31 |           |
| Zn-TCPP-Pt                                | front | 690 | 12.95 | 0.61 | 5.48 | (15)      |
|                                           | rear  | 690 | 10.93 | 0.63 | 4.88 |           |
| PW <sub>11</sub> Co/Co <sub>0.85</sub> Se | front | 830 | 15.94 | 0.60 | 7.51 | This work |
|                                           | rear  | 730 | 13.33 | 0.60 | 5.79 |           |

## References

- (1) H. Yuan, Q. Z. Jiao, J. Liu, X. F. Liu, Y. J. Li, D. X. Shi, Q. Wu, Y. Zhao and H. S. Li, Facile synthesis of Co<sub>0.85</sub>Se nanotubes/reduced graphene oxide nanocomposite as Pt-free counter electrode with enhanced electrocatalytic performance in dye-sensitized solar cells, *Carbon*, 2017, **122**, 381-388.
- (2) Q. S. Jiang and G. Hu, Co<sub>0.85</sub>Se hollow nanoparticles as Pt-free counter electrode materials for dye-sensitized solar cells, *Mater. Lett.*, 2015, **153**, 114-117.
- (3) L. Chen, H. X. Yin, Y. Zhou, H. Dai, T. Yu, J. G. Liua, and Z. G. Zou, In situ direct growth of single crystalline metal (Co, Ni) selenium nanosheets on metal fibers as counter electrodes toward low-cost, high-performance fiber-shaped dye-sensitized solar cells, *Nanoscale*, 2016, **8**, 2304-2308.
- (4) H. Yuan, Q. Z. Jiao, J. Liu, X. F. Liu, Y. J. Li, D. X. Shi, Q. Wu, Y. Zhao and H. S. Li, Facile synthesis of Co<sub>0.85</sub>Se nanotubes/reduced graphene oxide nanocomposite as Pt-free counter electrode with enhanced electrocatalytic performance in dye-



sensitized solar cells, *Carbon*, 2017, **122**, 381-388.

- (5) P. J. Li, Q. W. Tang, Highly transparent metal selenide counter electrodes for bifacial dye-sensitized solar cell, *J. Power Sources*, 2016, **317**, 43-48.
- (6) C. Q. Feng, G. Y. Zhao, Y. R. Li, H. L. Cheng and Z. S. Wang, Single-crystal cobalt selenide nanobelt as a highly efficient cathode for stable quasi-solid-state dye sensitized solar cell, *J. Power Sources*, 2019, **426**, 16-22.
- (7) W. W. Liu, W. Jiang, Y. C. Liu, W. J. Niu, M. C. Liu, K. Zhao, L. Y. Zhang, L. Lee, L. B. Kong and Y. L. Chueh, Platinum-Free Ternary Metallic Selenides as Nanostructured Counter Electrode for High-Efficiency Dye-Sensitized Solar Cell by Interface Engineering, *ACS Appl. Energy Mater.*, 2020, **3**, 3704-3713.
- (8) X. Zhang, Y.X. Yang, S.Q. Guo, F. Z and Hu, L. Liu, Mesoporous Ni<sub>0.85</sub>Se nanospheres grown in situ on graphene with high performance in dye-sensitized solar cells, *ACS Appl. Mater. Interfaces*, 2015, **7**, 8457-8464.
- (9) J. Gao, Y. Yang, Z. Zhang, J.Y. Yan, Z.H. Lin and X. Y. Guo, Bifacial quasi-solid-state dye-sensitized solar cells with Poly (vinyl pyrrolidone)/polyaniline transparent counter electrode, *Nano Energy*, 2016, **26**, 123-130.
- (10) P.Z. Yang, Q.W. Tang, Bifacial quasi-solid-state dye-sensitized solar cells with metal selenide counter electrodes, *Electrochim. Acta*, 2016, **188**, 560-565.
- (11) A. Khan, Y. T. Huang, T. Miyasaka, M. Ikegami, S. P. Feng and W. D. Li, Solution-Processed Transparent Nickel-Mesh Counter Electrode with in-Situ Electrodeposited Platinum Nanoparticles for Full-Plastic Bifacial Dye-Sensitized Solar Cells, *ACS Appl. Mater. Interfaces*, 2017, **9**, 8083-8091.
- (12) C. X. Wu, R. Li, Y. L. Wang, S. Lu, J. Lin, Y. C. Liu and X. T. Zhang, Strong metal-support interactions enable highly transparent Pt-Mo<sub>2</sub>C counter electrodes of

bifacial dye-sensitized solar cells, *Chem. Commun.*, 2020, **56**, 10046.

**(13)** J. Gao, Y. Yang, Z. Zhang, J. Y. Yan, Z. H. Lin, X. Y. Guo, Bifacial quasi-solid-state dye-sensitized solar cells with Poly (vinyl pyrrolidone)/polyaniline transparent counter electrode, *Nano Energy*, 2016, **26**, 123-130.

**(14)** T. Jeong, S. Y. Ham, B. Koo, P. Lee, Y. S. Min, J. Y. Kim, M. J. Ko, Transparent 3 nm-thick MoS<sub>2</sub> counter electrodes for bifacial dye-sensitized solar cells, *J. Ind. Eng. Chem.* 2019, **80**, 106-111.

**(15)** Y. B. Tian, Y. Y. Wang, S. M. Chen, Z. G. Gu and J. Zhang, Epitaxial Growth of Highly Transparent Metal–Porphyrin Framework Thin Films for Efficient Bifacial Dye-Sensitized Solar Cells, *ACS Appl. Mater. Interfaces*, 2020, **12**, 1078-1083.

**(16)** Y. B. Tang, C. S. Lee, J. Xu, Z. T. Liu, Z. H. Chen, Z. He, Y. L. Cao, G. Yuan, H. Song, L. Chen, L. Luo, H. M. Cheng, W. J. Zhang, I. Bello, S. T. Lee, Incorporation of Graphenes in Nanostructured TiO<sub>2</sub> Films via Molecular Grafting for Dye-Sensitized Solar Cell Application, *ACS Nano*, 2010, **4**, 3482-3488.
